# Supplementary material for: Detection of Colorectal Cancer and Advanced Adenoma by Liquid Biopsy (Decalib Study): The ddPCR Challenge
Source: MDPI journal article supplement (doi:10.3390/cancers12061482), 2020-06-06
Supplement: s1 [file s1]

# Supplementary materials: Detection of Colorectal Cancer and Advanced Adenoma by Liquid Biopsy (Decalib Study): The ddPCR Challenge

$R=0,89$

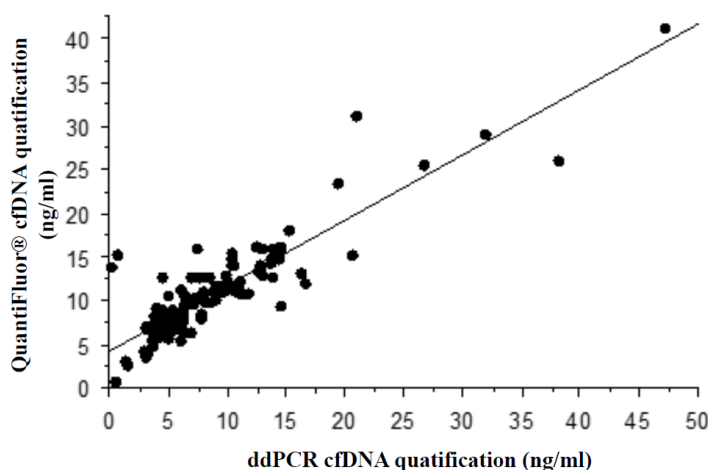

**Figure S1.** Comparison between the two methods of cfDNA quantification (ddPCR and Quantifluor®).

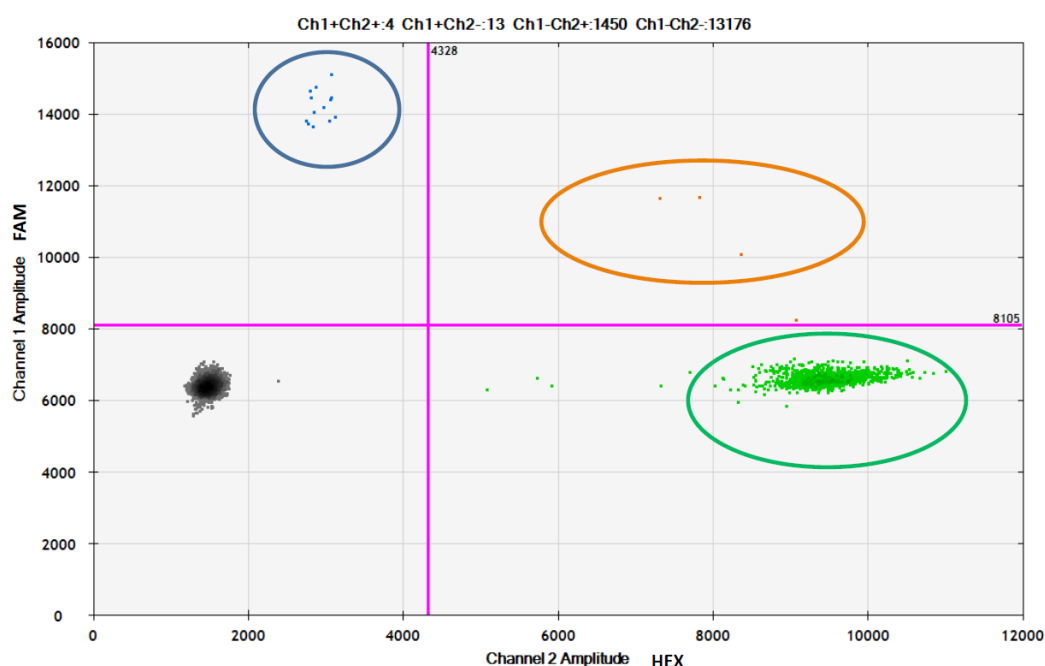

**Figure S2.** Representative 2D plots of the droplet digital PCR profile of a *BRAF V600E*-mutated control cell line. The pink lines indicate the threshold. Blue droplets are FAM positive droplets therefore containing mutated target DNA. Green droplets are HEX positive droplets containing the wild-type (non-mutated) target DNA. The FAM+HEX droplets are orange and contain the two types

of target DNA (mutant + wild-type). Finally, empty droplets do not present any fluorescent signal therefore are represented in grey.
